# Supplementary material
Source: MDPI journal article supplement (https://www.mdpi.com/1996-1073/18/1/165)
Supplement: s1 [file s1]

---

# **Standardizing the Ignition Delay Time Measurements of Rapid Compression Machine: An Inverse application of the Livengood-Wu Integral Method**

Zhonghao Zhao<sup>a,b</sup>, Yingtao Wu<sup>a,b\*</sup>

<sup>a</sup> Petroleum, Oil & Lubricants Department in Army Logistics Academy of PLA, Chongqing, 401311, China

<sup>b</sup> State Key Laboratory of Multiphase Flow in Power Engineering, Xi'an Jiaotong University, Xi'an, 710049, China

\*Corresponding author:

Dr. Yingtao Wu

State Key Laboratory of Multiphase Flows in Power Engineering,

Xi'an Jiaotong University, Xi'an, 710049, People's Republic of China

Phone: 86-29-8266-5075, Fax: 86-29-8266-8789

Email: wuyingtao@xjtu.edu.cn (YW)

---

## Supplementary Materials

Detailed values of the parameters and the corresponding  $\bar{\delta}$

Table. S1 Detailed values of the parameters and the corresponding  $\bar{\delta}$  of Inputs-1

| A         | n       | E         | $\bar{\delta}$ |
|-----------|---------|-----------|----------------|
| 1.0000E-6 | -1.0000 | 1.4959E+5 | -0.200         |
| 1.0000E-6 | -1.0000 | 1.4878E+5 | -0.100         |
| 1.7558E-6 | -1.0000 | 1.4411E+5 | -0.025         |
| 2.4049E-6 | -1.2924 | 1.4763E+5 | 0.002          |
| 1.0000E-6 | -1.0000 | 1.4684E+5 | 0.170          |
| 1.0000E-6 | -0.8228 | 1.4272E+5 | 0.260          |
| 2.2770E-6 | -0.9466 | 1.3875E+5 | 0.350          |
| 1.1425E-6 | -0.9417 | 1.4287E+5 | 0.500          |
| 1.1667E-6 | -0.9438 | 1.4156E+5 | 0.780          |
| 1.1678E-6 | -0.9438 | 1.4078E+5 | 1.000          |

Table. S2 Detailed values of the parameters and the corresponding  $\bar{\delta}$  of Inputs-2

| A         | n       | E         | $\bar{\delta}$ |
|-----------|---------|-----------|----------------|
| 4.0441E-6 | -0.6426 | 1.3048E+5 | -0.200         |
| 4.8284E-6 | -1.4456 | 1.4541E+5 | -0.100         |
| 3.6700E-6 | -1.2529 | 1.4253E+5 | -0.003         |
| 5.0685E-6 | -1.9038 | 1.5529E+5 | 0.000          |
| 2.0933E-6 | -0.7552 | 1.3526E+5 | 0.100          |
| 1.0000E-6 | -0.6172 | 1.3706E+5 | 0.200          |
| 5.0400E-6 | -1.0138 | 1.3329E+5 | 0.300          |
| 2.2525E-6 | -0.9979 | 1.3782E+5 | 0.470          |
| 3.6296E-6 | -1.4436 | 1.4332E+5 | 0.590          |

---



---

|           |         |           |       |
|-----------|---------|-----------|-------|
| 1.0000E-6 | -1.5000 | 1.5278E+5 | 0.840 |
|-----------|---------|-----------|-------|

---

Table. S3 Detailed values of the parameters and the corresponding  $\bar{\delta}$  of Inputs-3

---

| A         | n       | E         | $\bar{\delta}$ |
|-----------|---------|-----------|----------------|
| 1.9039E-6 | -1.3677 | 1.5241E+5 | -0.200         |
| 2.7323E-6 | -1.3797 | 1.4920E+5 | -0.100         |
| 2.7358E-6 | -1.3808 | 1.4876E+5 | -0.047         |
| 2.7743E-6 | -1.3889 | 1.4810E+5 | 0.050          |
| 2.7436E-6 | -1.3824 | 1.4774E+5 | 0.100          |
| 2.7880E-6 | -1.3912 | 1.4703E+5 | 0.200          |
| 2.7063E-6 | -1.3756 | 1.4642E+5 | 0.300          |
| 2.6892E-6 | -1.3738 | 1.4564E+5 | 0.450          |
| 9.8460E-6 | -1.3841 | 1.3510E+5 | 0.700          |
| 1.0000E-6 | -1.3693 | 1.5083E+5 | 0.900          |

---
